# Supplementary material
Source: publisher figshare collection journal article supplement (https://acs.figshare.com/ndownloader/files/4561792)
Supplement: Supplementary file 1 [file 4561792]

## Supporting Information

### Biosurfactants from Urban Wastes as Auxiliaries for Textile Dyeing

Piero Savarino,<sup>1</sup> Enzo Montoneri,<sup>1\*</sup> Stefano Bottigliengo,<sup>1</sup> Vittorio Boffa,<sup>1</sup> Tommaso Guizzetti<sup>1</sup>, Daniele G. Perrone<sup>1</sup> and Raniero Mendichi.<sup>2</sup>

<sup>1</sup>Dipartimento di Chimica Generale e Chimica Organica, Università di Torino, C. M. D'Azeglio 48, 10125 Torino, Italy

<sup>2</sup>Istituto per lo Studio delle Macromolecole (CNR), Via E. Bassini 15, I-20133 Milano, Italy

\*Corresponding author: [enzo.montoneri@unito.it](mailto:enzo.montoneri@unito.it)

#### Introduction

For the sake of completeness this file reports in Figures 1s-5s the detailed results of the measurements of colour fastness to washing and crocking which were obtained as reported in the manuscript section 2.5 and are summarized in the manuscript section 3.4.

#### Results

Figures 1s-5s below report the results of colour fastness to washing and crocking for the same samples to which manuscript Figure 2 refers: i.e., samples from dyeing trials performed with dyes 1-12 numbered on top of each histogram, in the absence or presence of the surface active agents reported in the abscissa axis and used at 2 g L<sup>-1</sup> concentration. Legends for the ordinate axes are according to section 2.5 of the manuscript experimental section. Legend for surface active agents in abscissa axes are as reported in the manuscript.

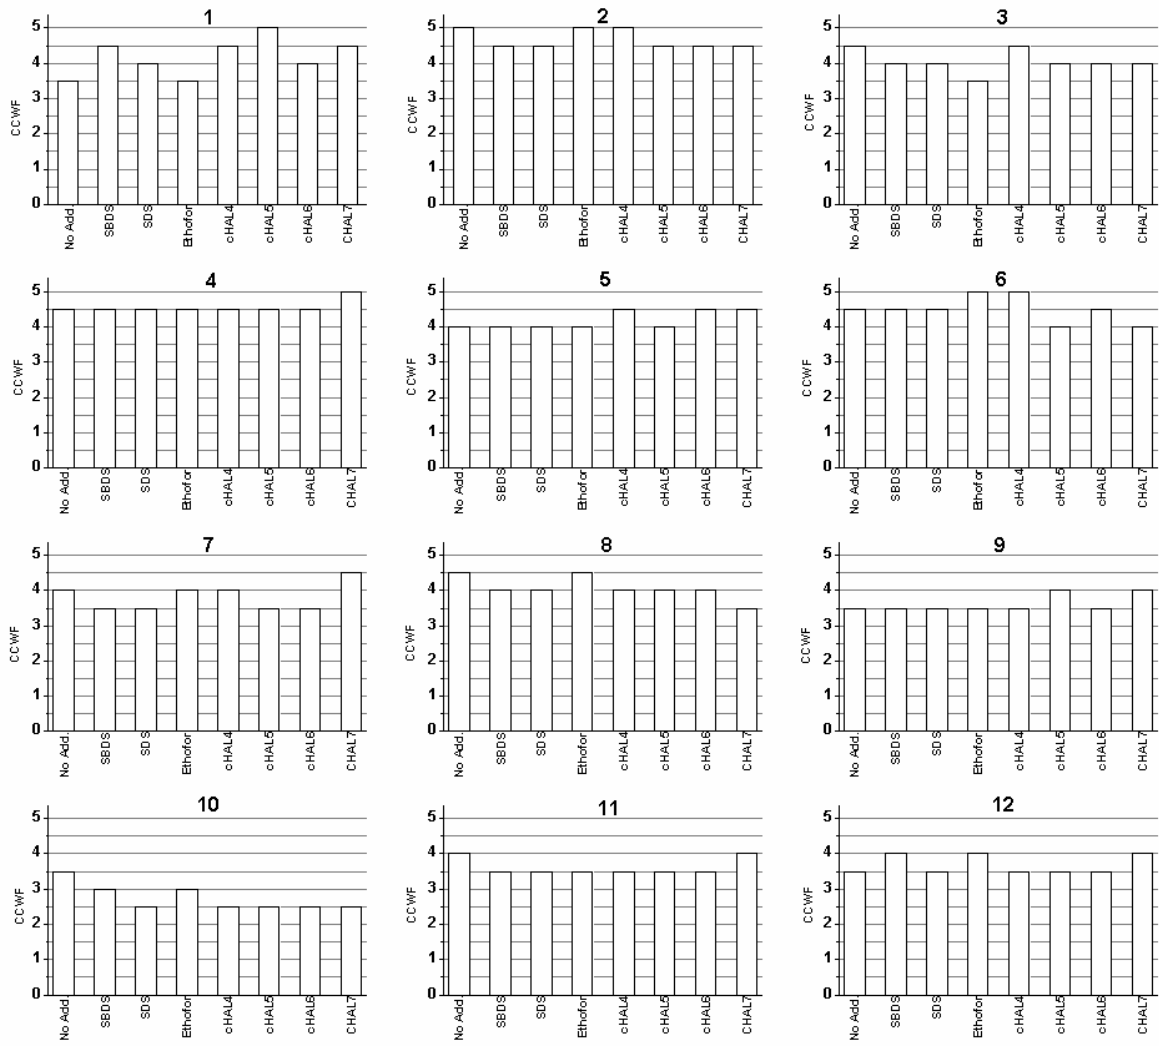

Figure 1s. Washing fastness by colour change (CCWF) for manuscript Figure 2 samples.

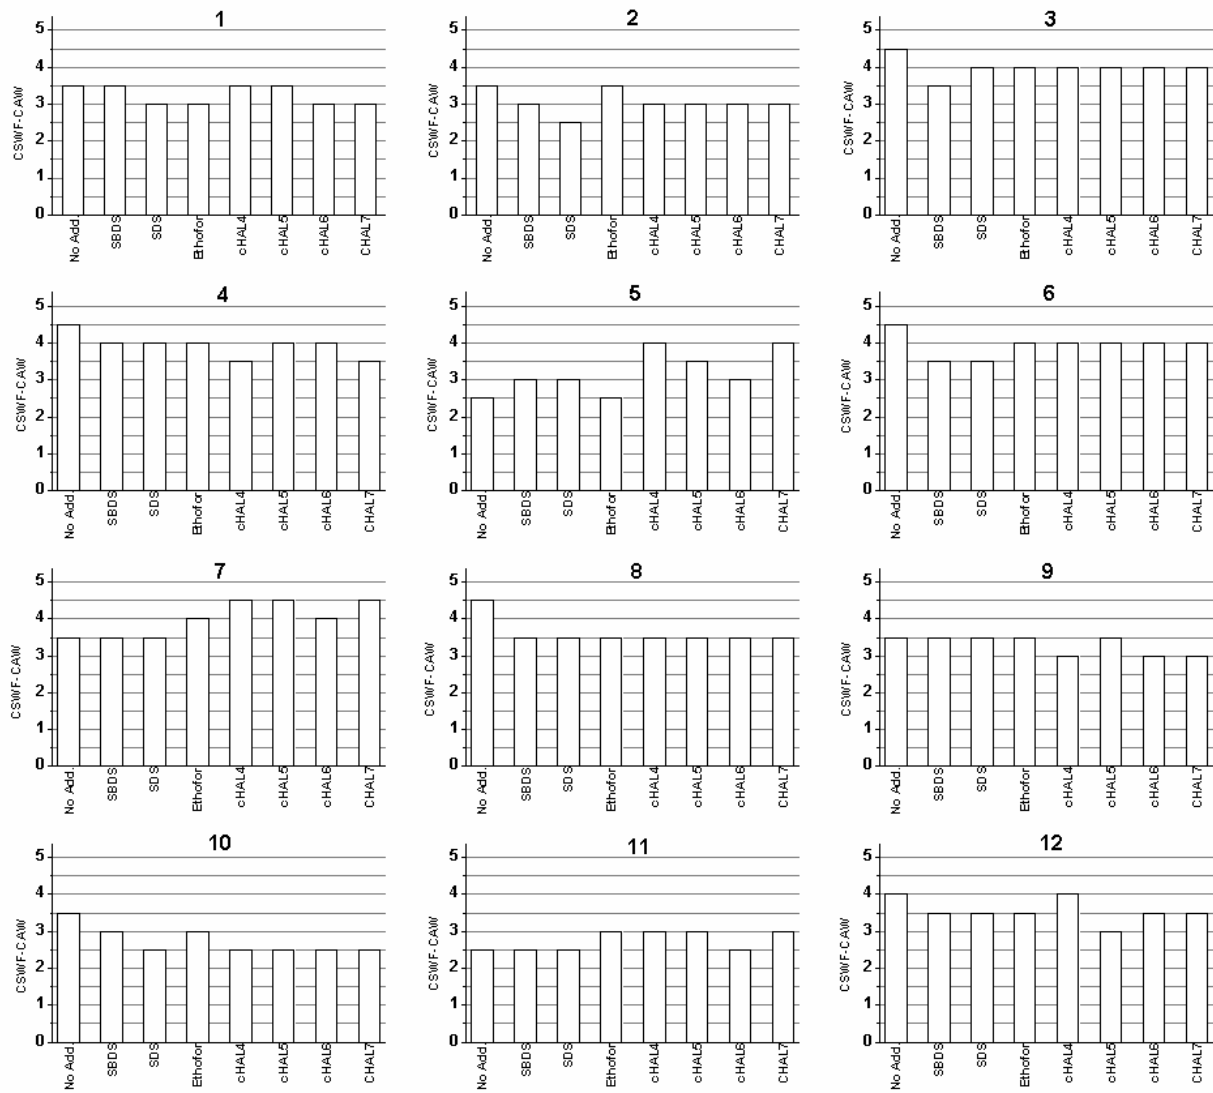

**Figure 2s.** Washing fastness by colour staining (CSWF-CAW) of cellulose acetate witness for manuscript Figure 2 samples.

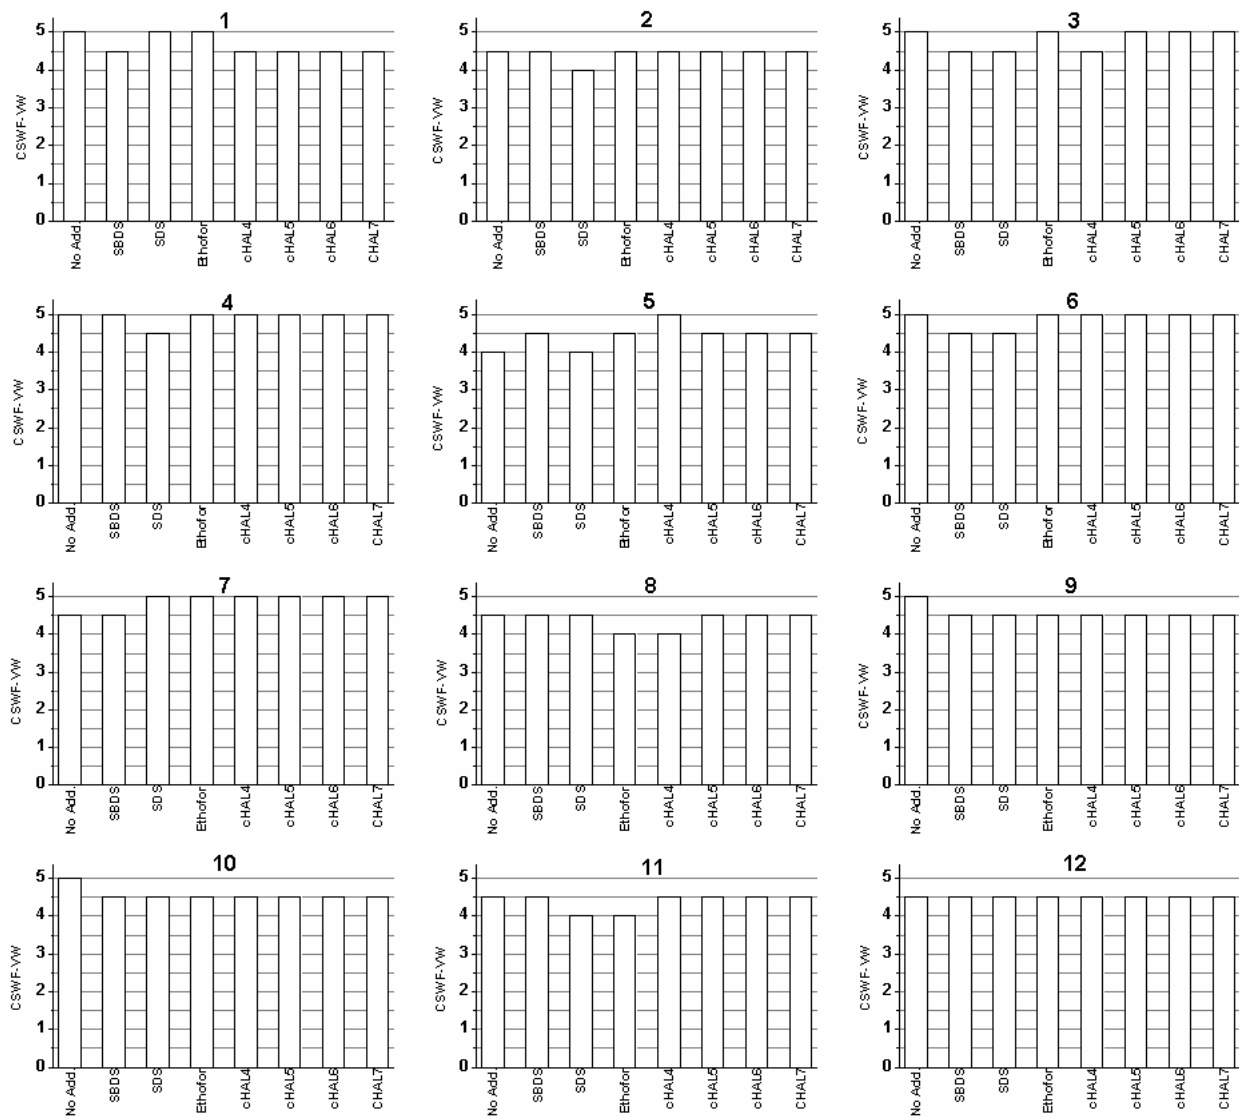

**Figure 3s.** Washing fastness by colour staining (CSWF-VW) of viscose witness for manuscript Figure 2 samples.

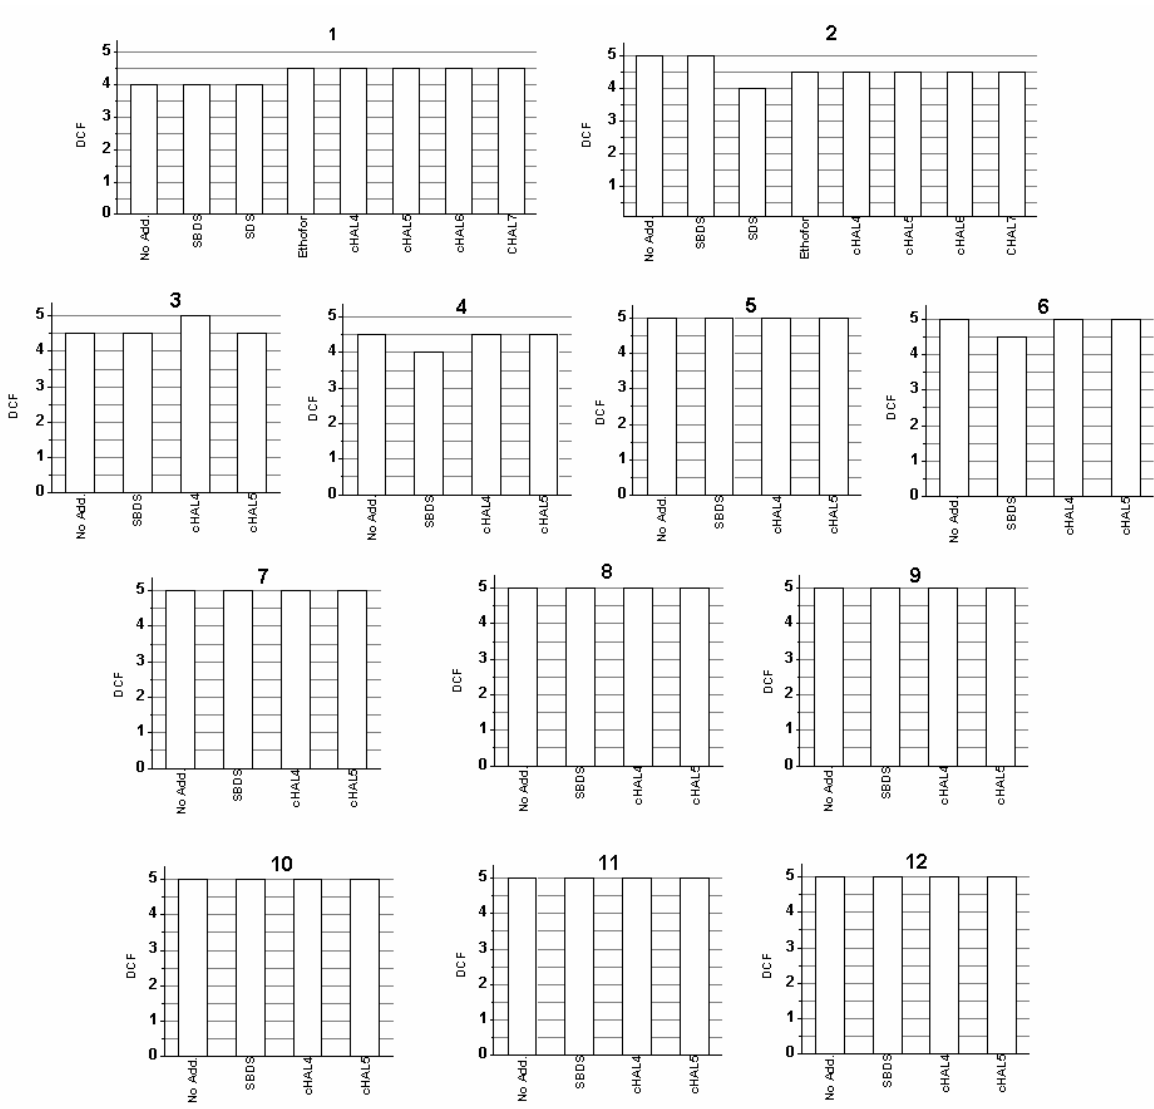

Figure 4s. Dry crocking fastness (DCF) for manuscript Figure 2 samples.

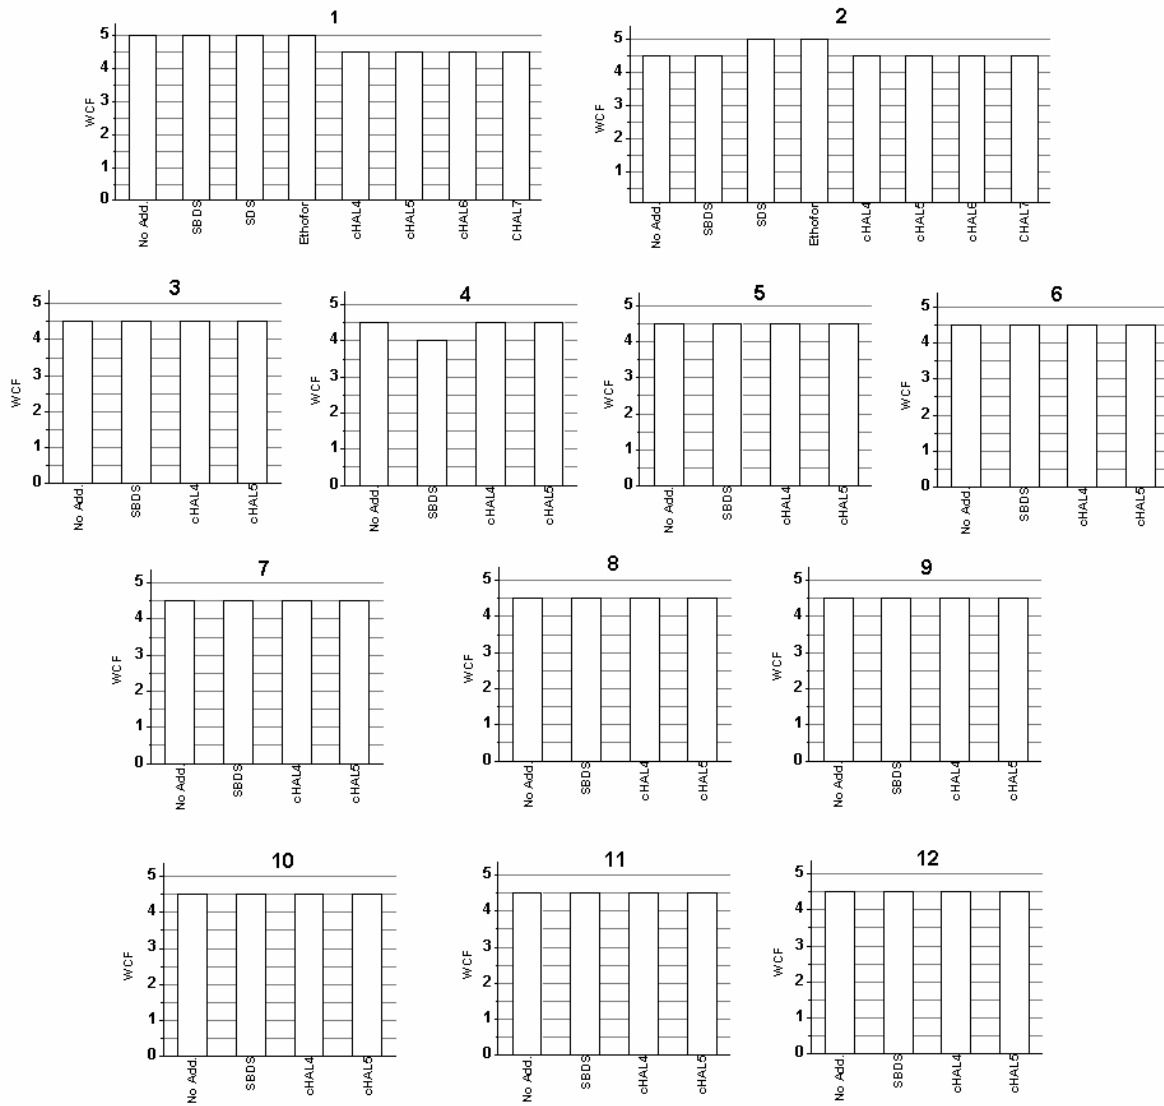

**Figure 5s.** Wet crocking fastness (WCF) for manuscript Figure 2 samples.
